# Supplementary material
Source: PubMed Central journal article supplement (PMC6499101)
Supplement: nxy318_supplemental_file.pdf [file nxy318_supplemental_file.pdf]

Supplemental Figure 1. Design of the DASH Trial.

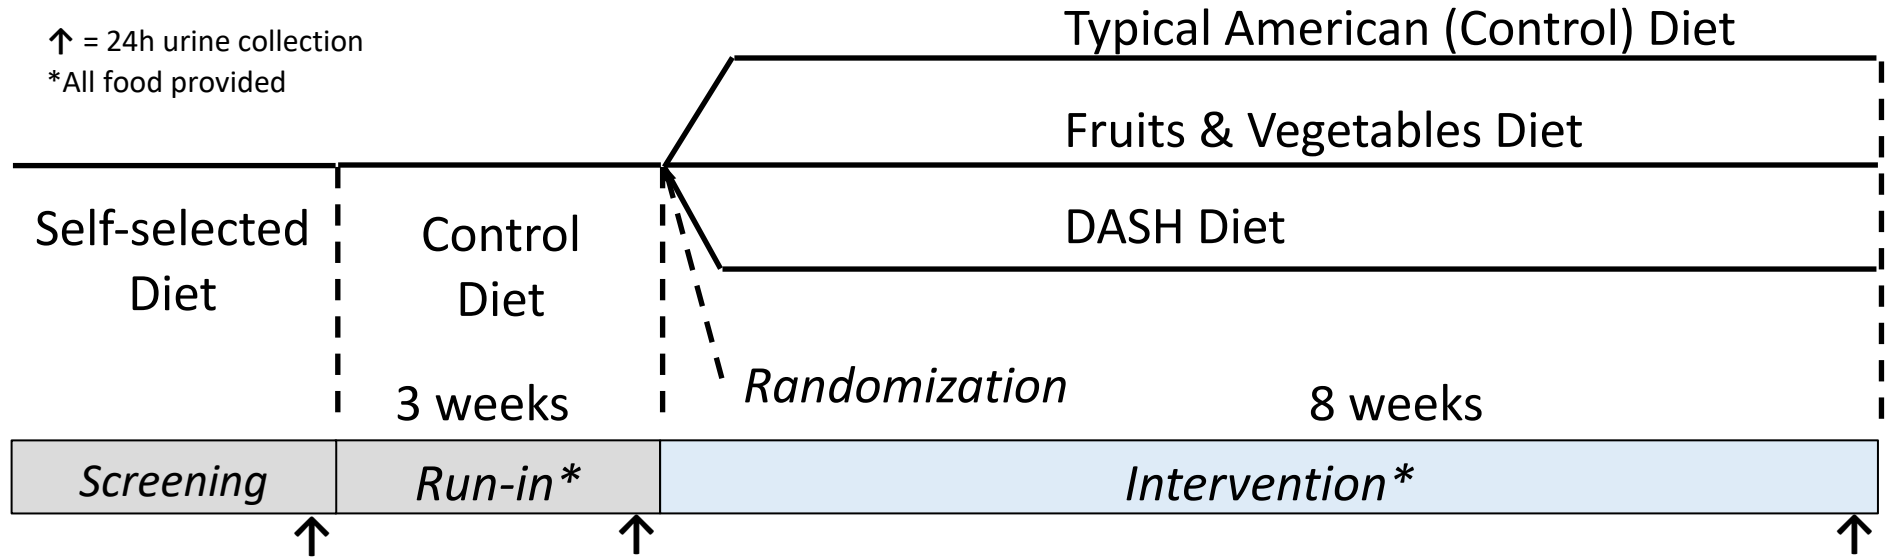

## Supplementary data

Supplemental Table 1. Sample 2100kcal/d menus from the DASH Trial for control, FV, and DASH diets.

|                                                                                                           | Control      | FV           | DASH         |
|-----------------------------------------------------------------------------------------------------------|--------------|--------------|--------------|
| <b>Dairy</b>                                                                                              |              |              |              |
| <b>Dairy and Egg Products, g/d</b>                                                                        | <b>63.4</b>  | <b>25</b>    | <b>803.3</b> |
| Butter, with salt, g/d                                                                                    | 0            | 25           | 0            |
| Butter, without salt, g/d                                                                                 | 35           | 0            | 10           |
| Cheese, parmesan, grated, g/d                                                                             | 0            | 0            | 10.5         |
| Cheese, pasteurized process, American, with disodium phosphate, g/d                                       | 28.4         | 0            | 0            |
| DASH Zucchini Lasagna (Composite for Lean Cuisine) , g/d                                                  | 0            | 0            | 311.8        |
| Milk, low fat, fluid, 1% fat, with added vitamin A, g/d                                                   | 0            | 0            | 244          |
| Yogurt, fruit, low fat, 9 grams protein per 237 mL, g/d                                                   | 0            | 0            | 227          |
| <b>Fruit/Veg</b>                                                                                          |              |              |              |
| <b>Fruits and Fruit Juices, g/d</b>                                                                       | <b>373</b>   | <b>751</b>   | <b>631.5</b> |
| Apple juice, canned or bottled, unsweetened, with added ascorbic acid, g/d                                | 126          | 0            | 0            |
| Apples, raw, with skin, g/d                                                                               | 0            | 0            | 138          |
| Apricot nectar, canned, with added ascorbic acid, g/d                                                     | 0            | 0            | 170.5        |
| Bananas, raw, g/d                                                                                         | 0            | 175          | 0            |
| Orange juice, canned, unsweetened, g/d                                                                    | 134          | 534          | 267          |
| Peaches, frozen, sliced, sweetened, g/d                                                                   | 56.5         | 0            | 0            |
| Raisins, seedless, g/d                                                                                    | 0            | 42           | 56           |
| Strawberries, frozen, unsweetened, g/d                                                                    | 56.5         | 0            | 0            |
| <b>Nut and Seed Products, g/d</b>                                                                         | <b>0</b>     | <b>0</b>     | <b>25</b>    |
| Nuts, almonds, dried, blanched, g/d                                                                       | 0            | 0            | 25           |
| <b>Vegetables and Vegetable Products, g/d</b>                                                             | <b>97</b>    | <b>281</b>   | <b>208</b>   |
| Carrots, raw, g/d                                                                                         | 0            | 80           | 0            |
| Lettuce, iceberg (includes crisphead types), raw, g/d                                                     | 15           | 25           | 40           |
| Pickles, cucumber, dill, g/d                                                                              | 12           | 36           | 48           |
| Spinach, frozen, chopped or leaf, cooked, boiled, drained, without salt, g/d                              | 0            | 100          | 0            |
| Spinach, raw, g/d                                                                                         | 0            | 0            | 70           |
| Squash, summer, crookneck and straightneck, cooked, boiled, drained, without salt, g/d                    | 70           | 0            | 0            |
| Tomatoes, red, ripe, raw, year round average, g/d                                                         | 0            | 40           | 50           |
| <b>Grain</b>                                                                                              |              |              |              |
| <b>Baked Products, g/d</b>                                                                                | <b>188.3</b> | <b>144.8</b> | <b>151.8</b> |
| Bread, rolls, country style classic dinner rolls, Pepperidge farm, g/d                                    | 0            | 37.8         | 37.8         |
| Bread, rolls, sandwich sliced w/sesame seeds, Pepperidge farm, g/d                                        | 45.5         | 0            | 0            |
| Bread, white, commercially prepared (includes soft bread crumbs), g/d                                     | 56           | 0            | 0            |
| Bread, whole wheat 100%, Pepperidge farm, g/d                                                             | 0            | 68           | 114          |
| Cookies, animal crackers (includes arrowroot, tea biscuits,), g/d                                         | 56.8         | 0            | 0            |
| Cookies, chocolate chip, commercially prepared, regular, higher fat, enriched, g/d                        | 30           | 0            | 0            |
| Waffles, plain, frozen, ready-to-heat (includes buttermilk), g/d                                          | 0            | 39           | 0            |
| <b>Breakfast Cereals, g/d</b>                                                                             | <b>23</b>    | <b>0</b>     | <b>35</b>    |
| Cereals ready-to-eat, Kellogg,., Kellogg's Complete Bran Flakes, g/d                                      | 0            | 0            | 35           |
| Cereals, Quaker, corn grits, instant, plain, dry, g/d                                                     | 23           | 0            | 0            |
| <b>Cereal Grains and Pasta, g/d</b>                                                                       | <b>100</b>   | <b>0</b>     | <b>0</b>     |
| Rice, white, long-grain, parboiled, cooked, enriched, g/d                                                 | 100          | 0            | 0            |
| <b>Meat</b>                                                                                               |              |              |              |
| <b>Beef Products, g/d</b>                                                                                 | <b>100</b>   | <b>114</b>   | <b>0</b>     |
| Beef, round, eye of round, separable lean only, trimmed to zero visible fat, choice, cooked, roasted, g/d | 100          | 114          | 0            |
| <b>Finfish and Shellfish Products, g/d</b>                                                                | <b>0</b>     | <b>0</b>     | <b>85</b>    |
| Finfish, tuna, light, canned in water, drained solids, g/d                                                | 0            | 0            | 85           |
| <b>Poultry Products, g/d</b>                                                                              | <b>0</b>     | <b>198</b>   | <b>0</b>     |
| DASH Chicken Pot Pie (composite for Swanson), g/d                                                         | 0            | 198          | 0            |

Supplementary data

|              |                                                                       |           |             |           |
|--------------|-----------------------------------------------------------------------|-----------|-------------|-----------|
|              | <b>Sausages and Luncheon Meats, g/d</b>                               | <b>60</b> | <b>0</b>    | <b>0</b>  |
|              | Pastrami, turkey, g/d                                                 | 60        | 0           | 0         |
| <b>Other</b> |                                                                       |           |             |           |
|              | <b>Beverages, g/d</b>                                                 | <b>44</b> | <b>0</b>    | <b>0</b>  |
|              | Fruit punch-flavor drink, powder, with added sodium, g/d              | 44        | 0           | 0         |
|              | <b>Fats and Oils, g/d</b>                                             | <b>20</b> | <b>12</b>   | <b>22</b> |
|              | Oil, vegetable corn, salad or cooking, g/d                            | 0         | 0           | 10        |
|              | Oil, vegetable safflower, salad or cooking, linoleic, (over 70%), g/d | 8         | 0           | 0         |
|              | Salad dressing, mayonnaise, soybean oil, with salt, g/d               | 12        | 12          | 12        |
|              | <b>Snacks, g/d</b>                                                    | <b>0</b>  | <b>56.8</b> | <b>0</b>  |
|              | Snacks, potato chips, plain, salted, g/d                              | 0         | 56.8        | 0         |
|              | <b>Soups, Sauces, and Gravies, g/d</b>                                | <b>45</b> | <b>0</b>    | <b>0</b>  |
|              | Gravy, beef, canned, g/d                                              | 45        | 0           | 0         |
|              | <b>Spices and Herbs, g/d</b>                                          | <b>5</b>  | <b>0</b>    | <b>5</b>  |
|              | Mustard, prepared/yellow/salad, g/d                                   | 5         | 0           | 0         |
|              | Vinegar, cider, g/d                                                   | 0         | 0           | 5         |
|              | <b>Sweets, g/d</b>                                                    | <b>14</b> | <b>0</b>    | <b>0</b>  |
|              | Jellies, g/d                                                          | 14        | 0           | 0         |

Fruit/Veg = Fruits and vegetables.

Supplementary data

Supplemental Figure 2. Composite sample analysis flow diagram using 2100 kcal/d control diet as an example. This process was repeated for each calorie level / diet combination.

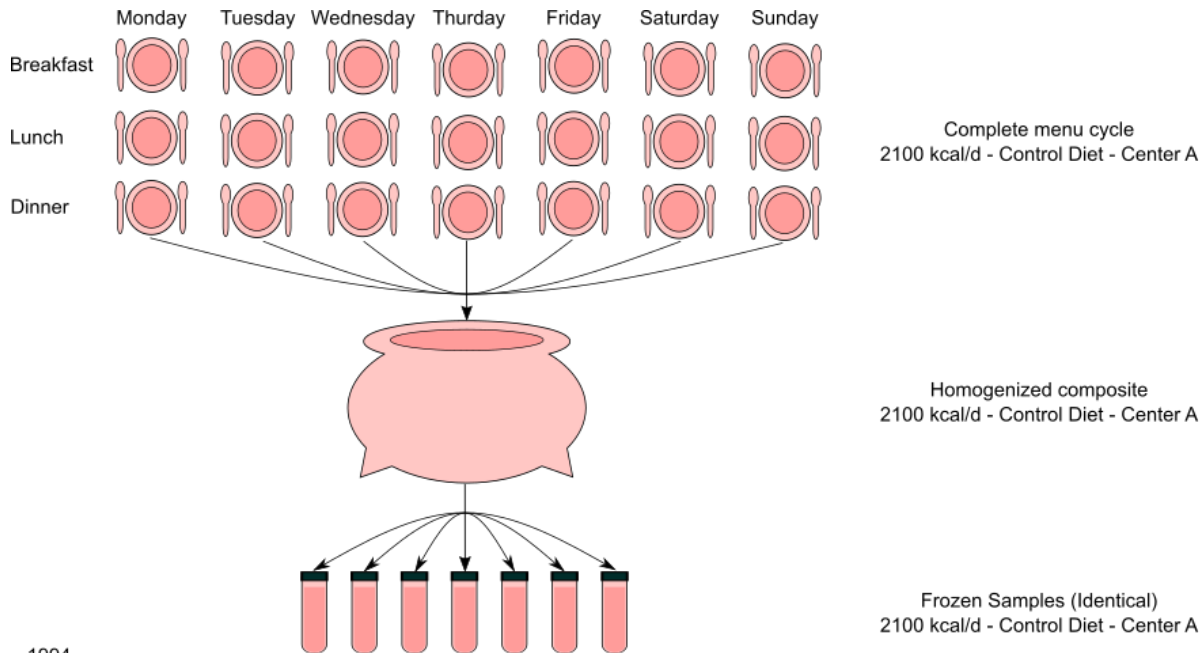

1994

2018

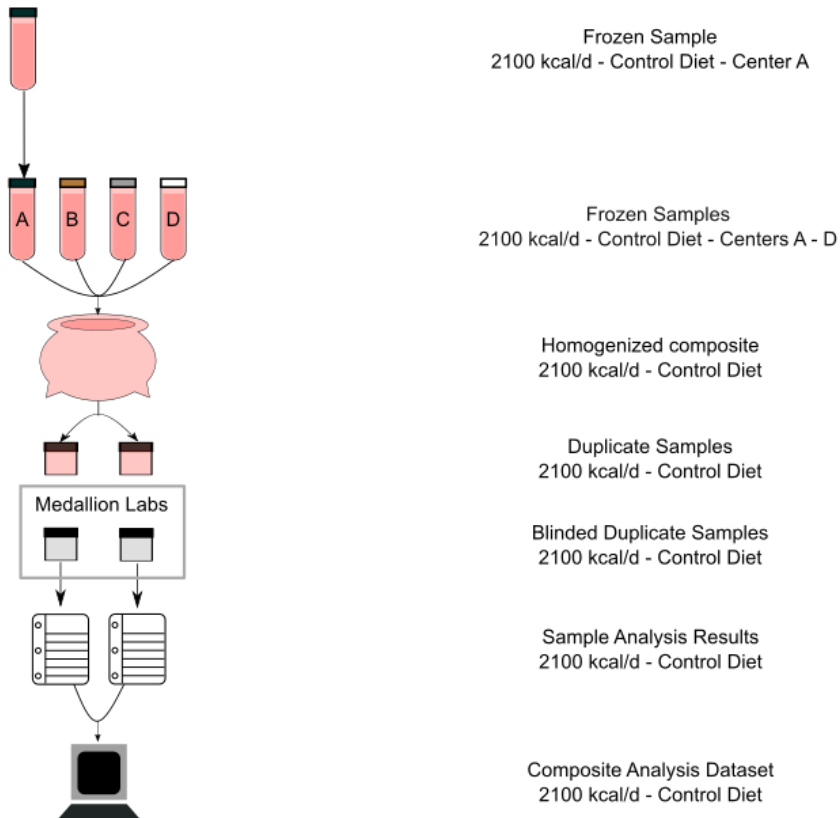

Supplementary data

Supplemental Table 2. Amount of phosphorus contributed by different food groups in the three DASH Trial diets at the 2100 kcal/d energy level.

|                                                             | Control          | FV               | DASH             |
|-------------------------------------------------------------|------------------|------------------|------------------|
| <b>Dairy, mg P / 2100 kcal (% of total)</b>                 | <b>135 (10%)</b> | <b>72 (4%)</b>   | <b>600 (28%)</b> |
| Dairy and Egg Products, mg P /2100 kcal                     | 135              | 72               | 600              |
| <b>Fruits and Vegetables, mg P / 2100 kcal (% of total)</b> | <b>52 (4%)</b>   | <b>627 (36%)</b> | <b>551 (26%)</b> |
| Fruits and Fruit Juices, mg P /2100 kcal                    | 18               | 133              | 125              |
| Legumes and Legume Products, mg P /2100 kcal                | 0                | 212              | 143              |
| Nut and Seed Products, mg P /2100 kcal                      | 0                | 189              | 175              |
| Vegetables and Vegetable Products, mg P /2100 kcal          | 35               | 94               | 108              |
| <b>Grain, mg P / 2100 kcal (% of total)</b>                 | <b>298 (22%)</b> | <b>206 (12%)</b> | <b>258 (12%)</b> |
| Baked Products, mg P /2100 kcal                             | 214              | 71               | 59               |
| Breakfast Cereals, mg P /2100 kcal                          | 14               | 61               | 103              |
| Cereal Grains and Pasta, mg P /2100 kcal                    | 70               | 74               | 95               |
| <b>Meat, mg P / 2100 kcal (% of total)</b>                  | <b>793 (58%)</b> | <b>736 (42%)</b> | <b>669 (32%)</b> |
| Beef Products, mg P /2100 kcal                              | 165              | 177              | 128              |
| Finfish and Shellfish Products, mg P /2100 kcal             | 183              | 145              | 168              |
| Pork Products, mg P /2100 kcal                              | 155              | 167              | 111              |
| Poultry Products, mg P /2100 kcal                           | 173              | 128              | 166              |
| Sausages and Luncheon Meats, mg P /2100 kcal                | 117              | 119              | 95               |
| <b>Other, mg P / 2100 kcal (% of total)</b>                 | <b>95 (7%)</b>   | <b>110 (6%)</b>  | <b>30 (1%)</b>   |
| Beverages, mg P /2100 kcal                                  | 21               | 0                | 2                |
| Fats and Oils, mg P /2100 kcal                              | 4                | 4                | 4                |
| Snacks, mg P /2100 kcal                                     | 0                | 70               | 0                |
| Soups, Sauces, and Gravies, mg P /2100 kcal                 | 16               | 10               | 2                |
| Spices and Herbs, mg P /2100 kcal                           | 0                | 0                | 0                |
| Sweets, mg P /2100 kcal                                     | 54               | 26               | 22               |
| <b>Total, mg P / 2100 kcal</b>                              | <b>1373</b>      | <b>1751</b>      | <b>2108</b>      |

FV = Fruits and vegetables diet, DASH = DASH diet.

Supplemental Table 3. Participant characteristics by data completeness in adult participants of the DASH trial.<sup>1</sup>

|                                            |             | Run-in      |            |            | Intervention |            |            | Change      |            |            |
|--------------------------------------------|-------------|-------------|------------|------------|--------------|------------|------------|-------------|------------|------------|
|                                            |             | Complete    | Missing    | <i>P</i> * | Complete     | Missing    | <i>P</i> * | Complete    | Missing    | <i>P</i> * |
| <i>n</i>                                   |             | 367         | 92         |            | 387          | 69         |            | 341         | 118        |            |
| Age, y                                     |             | 45.1 ± 10.7 | 42.2 ± 9.5 | 0.018      | 45.2 ± 10.7  | 40.8 ± 9.4 | 0.001      | 45.6 ± 10.8 | 41.7 ± 9.5 | <0.001     |
| Race                                       |             |             |            | <0.001     |              |            | <0.001     |             |            | <0.001     |
|                                            | Non-black   | 162 (44.1)  | 22 (23.9)  |            | 169 (43.7)   | 14 (20.3)  |            | 152 (44.6)  | 32 (27.1)  |            |
|                                            | Black       | 205 (55.9)  | 70 (76.1)  |            | 218 (56.3)   | 55 (79.7)  |            | 189 (55.4)  | 86 (72.9)  |            |
| Sex                                        |             |             |            | 0.11       |              |            | 0.058      |             |            | 0.017      |
|                                            | Female      | 173 (47.1)  | 52 (56.5)  |            | 182 (47.0)   | 41 (59.4)  |            | 156 (45.7)  | 69 (58.5)  |            |
|                                            | Male        | 194 (52.9)  | 40 (43.5)  |            | 205 (53.0)   | 28 (40.6)  |            | 185 (54.3)  | 49 (41.5)  |            |
| Body mass intake, kg/m <sup>2</sup>        |             | 28.1 ± 3.9  | 28.6 ± 4.0 | 0.35       |              |            |            |             |            |            |
| Serum 1,25-dihydroxycholecalciferol, pg/mL |             | 38 ± 9      | 34 ± 7     | 0.001      | 36 ± 10      | 37 ± 9     | 0.51       | -2 ± 9      | 1 ± 7      | 0.006      |
| Smoking Status                             |             |             |            | 0.006      |              |            | 0.49       |             |            | 0.013      |
|                                            | Current     | 34 (22.4)   | 14 (46.7)  |            | 40 (25.5)    | 8 (32.0)   |            | 31 (22.0)   | 17 (41.5)  |            |
|                                            | Not Current | 118 (77.6)  | 16 (53.3)  |            | 117 (74.5)   | 17 (68.0)  |            | 110 (78.0)  | 24 (58.5)  |            |
| Energy intake, kcal/d                      |             | 2579 ± 522  | 2412 ± 442 | 0.019      | 2643 ± 572   | 2436 ± 417 | 0.032      | 72 ± 229    | 58 ± 241   | 0.64       |
| Study Site                                 |             |             |            | <0.001     |              |            | <0.001     |             |            | <0.001     |
|                                            | A           | 120 (32.7)  | 4 (4.3)    |            | 118 (30.5)   | 6 (8.7)    |            | 115 (33.7)  | 9 (7.6)    |            |
|                                            | B           | 71 (19.3)   | 43 (46.7)  |            | 73 (18.9)    | 40 (58.0)  |            | 65 (19.1)   | 49 (41.5)  |            |
|                                            | C           | 60 (16.3)   | 32 (34.8)  |            | 75 (19.4)    | 15 (21.7)  |            | 51 (15.0)   | 41 (34.7)  |            |
|                                            | D           | 116 (31.6)  | 13 (14.1)  |            | 121 (31.3)   | 8 (11.6)   |            | 110 (32.3)  | 19 (16.1)  |            |
| Diet Arm                                   |             |             |            | 0.48       |              |            | 0.55       |             |            | 0.66       |
|                                            | Control     | 120 (32.7)  | 34 (37.0)  |            | 126 (32.6)   | 27 (39.1)  |            | 111 (32.6)  | 43 (36.4)  |            |
|                                            | FV          | 128 (34.9)  | 26 (28.3)  |            | 131 (33.9)   | 22 (31.9)  |            | 118 (34.6)  | 36 (30.5)  |            |
|                                            | DASH        | 119 (32.4)  | 32 (34.8)  |            | 130 (33.6)   | 20 (29.0)  |            | 112 (32.8)  | 39 (33.1)  |            |

<sup>1</sup>Values are mean ± sd or frequency (percent). \*Chi-square for categorical variables, t-test for continuous variables. FV = Fruits and vegetables diet, DASH = DASH diet.

## Supplementary data

Supplemental Table 4. Regression coefficients from a linear regression of subgroup characteristics on phosphorus outcomes for the change from end of run-in to end of intervention in adults participants of the DASH trial.<sup>1</sup>

|                                            |                       | <i>n</i> | Dietary phosphorus intake, mg/d |                       | Urinary phosphorus excretion, mg/d | Urinary phosphorus excretion, % of intake |                       |
|--------------------------------------------|-----------------------|----------|---------------------------------|-----------------------|------------------------------------|-------------------------------------------|-----------------------|
|                                            |                       |          | Composite sample                | Nutrient database     |                                    | Composite sample                          | Nutrient database     |
| Age, y                                     | Crude <sup>2</sup>    | 341      | -1.8<br>(-3.6, 0.0)*            | -0.7<br>(-2.1, 0.7)   | -1.4<br>(-4.4, 1.6)                | -0.1<br>(-0.4, 0.1)                       | -0.2<br>(-0.4, 0.1)   |
|                                            | Adjusted <sup>3</sup> | 333      | -1.7<br>(-2.9, -0.6)*           | -0.9<br>(-1.6, -0.1)* | -1.7<br>(-4.8, 1.4)                | -0.2<br>(-0.4, 0.1)                       | -0.2<br>(-0.4, 0.1)   |
| Body mass intake, kg/m <sup>2</sup>        | Crude <sup>2</sup>    | 341      | 9.1<br>(4.2, 14.0)*             | 6.1<br>(2.3, 9.8)*    | 14.5<br>(6.4, 22.6)*               | 0.9<br>(0.2, 1.5)*                        | 0.9<br>(0.2, 1.6)*    |
|                                            | Adjusted <sup>3</sup> | 333      | 7.5<br>(4.4, 10.7)*             | 4.3<br>(2.3, 6.4)*    | 16.5<br>(8.2, 24.9)*               | 1.0<br>(0.4, 1.7)*                        | 1.1<br>(0.4, 1.8)*    |
| Energy intake, 100 kcal/d                  | Crude <sup>2</sup>    | 341      | 56.1<br>(50.0, 62.2)*           | 49.6<br>(45.8, 53.3)* | 1.8<br>(-12.3, 16.0)               | -1.7<br>(-2.9, -0.6)*                     | -1.9<br>(-3.1, -0.7)* |
|                                            | Adjusted <sup>3</sup> | 333      | 54.1<br>(48.8, 59.5)*           | 48.5<br>(44.9, 52.0)* | 1.6<br>(-12.5, 15.8)               | -1.7<br>(-2.9, -0.6)*                     | -1.8<br>(-3.0, -0.7)* |
| Race, black vs other                       | Crude <sup>2</sup>    | 341      | -6.5<br>(-45.4, 32.5)           | 0.4<br>(-29.3, 30.1)  | -49.3<br>(-113.6, 15.0)            | -0.6<br>(-5.9, 4.6)                       | -1.7<br>(-7.2, 3.8)   |
|                                            | Adjusted <sup>3</sup> | 333      | 15.4<br>(-13.3, 44.1)           | 10.7<br>(-8.2, 29.6)  | -59.6<br>(-135.7, 16.5)            | -0.9<br>(-7.1, 5.3)                       | -2.2<br>(-8.7, 4.2)   |
| Serum 1,25-dihydroxycholecalciferol, pg/mL | Crude <sup>2</sup>    | 333      | 0.4<br>(-2.0, 2.7)              | -0.2<br>(-2.0, 1.5)   | -0.2<br>(-4.1, 3.7)                | 0.0<br>(-0.3, 0.3)                        | 0.0<br>(-0.3, 0.3)    |
|                                            | Adjusted <sup>3</sup> | 333      | 0.9<br>(-0.5, 2.4)              | 0.4<br>(-0.6, 1.4)    | 0.1<br>(-3.7, 4.0)                 | 0.0<br>(-0.4, 0.3)                        | 0.0<br>(-0.4, 0.3)    |
| Sex, male vs female                        | Crude <sup>2</sup>    | 341      | 126.2<br>(89.7, 162.7)*         | 67.3<br>(38.5, 96.1)* | 33.7<br>(-30.7, 98.0)              | 0.1<br>(-5.2, 5.3)                        | 0.6<br>(-4.9, 6.0)    |
|                                            | Adjusted <sup>3</sup> | 333      | 118.1<br>(92.2, 144.0)*         | 59.2<br>(42.2, 76.3)* | 1.9<br>(-66.8, 70.6)               | -1.2<br>(-6.8, 4.3)                       | -1.1<br>(-6.9, 4.7)   |
| Smoking status, current smoker vs other    | Crude <sup>2</sup>    | 141      | -7.3<br>(-83.7, 69.2)           | -7.8<br>(-66.4, 50.9) | -82.8<br>(-208.2, 42.7)            | -5.2<br>(-15.1, 4.7)                      | -5.7<br>(-16.1, 4.6)  |
|                                            | Adjusted <sup>3</sup> | 138      | -8.6<br>(-56.2, 39.0)           | -6.8<br>(-36.5, 22.8) | -84.5<br>(-217.8, 48.8)            | -5.1<br>(-15.7, 5.6)                      | -5.8<br>(-16.9, 5.2)  |

<sup>1</sup>Values are means (95% CIs). <sup>2</sup>adjusted for randomization group <sup>3</sup>adjusted for age, body mass index (at baseline), race, sex, study center, randomization group, and change in energy intake and serum 1,25-dihydroxycholecalciferol (pg/mL). \*significantly different than zero, *P* < 0.05.
